# Supplementary material for: Aberrant expression of nuclear HDAC3 and cytoplasmic CDH1 predict a poor prognosis for patients with pancreatic cancer
Source: PubMed Central journal article supplement (PMC4941331; doi:10.18632/oncotarget.7663), 2016-02-24
Supplement: oncotarget-07-16505-s001.pdf [file oncotarget-07-16505-s001.pdf]

## Aberrant expression of nuclear HDAC3 and cytoplasmic CDH1 predict a poor prognosis for patients with pancreatic cancer

### Supplementary Materials

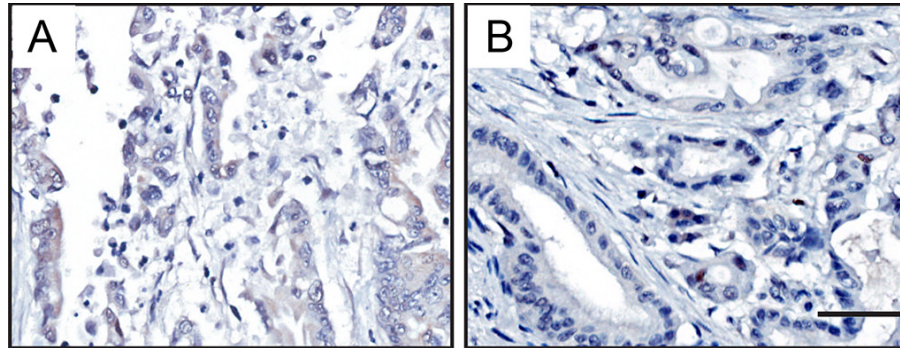

Supplementary Figure S1: Immunohistochemical staining of negative control for CDH1 (A) and HDAC3 (B) in PC tissues. Scale bar, 50  $\mu$ m.

### Supplementary Table S1: Association between nuclear HDAC3 and cell membrane CDH1 expression

| Tumor tissue sample | Nuclear HDAC3 |      | Correlation coefficient | P-value |
|---------------------|---------------|------|-------------------------|---------|
|                     | Low           | High |                         |         |
| Membrane CDH1 Low   | 7             | 24   | -0.348                  | 0.001*  |
| Membrane CDH1 High  | 31            | 22   |                         |         |

### Supplementary Table S2: Association between cytoplasmic HDAC3 and cell membrane CDH1 expression

| Tumor tissue sample | Cytoplasmic HDAC3 |      | Correlation coefficient | P-value |
|---------------------|-------------------|------|-------------------------|---------|
|                     | Low               | High |                         |         |
| Membrane CDH1 Low   | 14                | 17   | -0.001                  | 0.991   |
| Membrane CDH1 High  | 24                | 29   |                         |         |

### Supplementary Table S3: Association between cytoplasmic HDAC3 and cytoplasmic CDH1 expression

| Tumor tissue sample   | Cytoplasmic HDAC3 |      | Correlation coefficient | P-value |
|-----------------------|-------------------|------|-------------------------|---------|
|                       | Low               | High |                         |         |
| Cytoplasmic CDH1 Low  | 26                | 30   | 0.034                   | 0.760   |
| Cytoplasmic CDH1 High | 12                | 16   |                         |         |

**Supplementary Table S4: Spearman correlation analysis between CDH1 and HDAC3 and cumulative survival**

| Variables         | Cumulative survival  |                 |
|-------------------|----------------------|-----------------|
|                   | Spearman correlation | <i>P</i> -value |
| Membrane CDH1     | 0.240                | 0.028           |
| Cytoplasmic CDH1  | -0.435               | < 0.001*        |
| Nuclear HDAC3     | -0.530               | < 0.001*        |
| Cytoplasmic HDAC3 | 0.088                | 0.424           |

\**P* < 0.05 statistically significant.

**Supplementary Table S5: Spearman correlation analysis between high co-expression group and clinical stage and lymph node metastasis**

| Variables              | Co-expression group  |                 |
|------------------------|----------------------|-----------------|
|                        | Spearman correlation | <i>P</i> -value |
| Clinical stage         | 0.506                | < 0.001*        |
| Lymph nodes metastasis | 0.436                | < 0.001*        |
